# Supplementary material for: Ward-based in situ simulation: lessons learnt from a UK District General Hospital
Source: PubMed Central journal article supplement — BMJ Open Qual. 2024 May 15;13(2):e002571. doi: 10.1136/bmjoq-2023-002571 (PMC11097843; doi:10.1136/bmjoq-2023-002571), 2024-05-15
Supplement: bmjoq-2023-002571supp001.pdf [file bmjoq-2023-002571supp001.pdf]

**Supplementary table 1** Summary of Clinical Teamwork scores [scale 0-10]

| <b>Assessment item</b>                             | <b>Mean+S.E.M. [0=low, 10=high]</b> |
|----------------------------------------------------|-------------------------------------|
| Overall teamwork performance during this emergency | 4.3±0.5                             |
| Overall communication                              | 3.8±0.5                             |
| Orientating new members using SBAR                 | 4.3±0.7*                            |
| Transparent thinking                               | 3.6±0.5                             |
| Directed communication                             | 3.4±0.5                             |
| Closed loop communication                          | 2.2±0.5                             |
| Overall situational awareness                      | 3.3±0.4                             |
| Resource allocation                                | 3±0.7                               |
| Target fixation                                    | 4.5±0.7                             |
| Overall decision making                            | 4.1±0.5                             |
| Prioritisation                                     | 3.6±0.6                             |
| Role clarity                                       | 3.1±0.6                             |
| Performing as a leader/follower                    | 3.8±0.5                             |
| Patient friendly teamwork                          | 4.4±0.6**                           |

Abbreviations: SBAR: situation, background, assessment, recommendation; \*n=9; \*\*n=10.
