# Supplementary material for: Ward-based in situ simulation: lessons learnt from a UK District General Hospital
Source: PubMed Central journal article supplement — BMJ Open Qual. 2024 May 15;13(2):e002571. doi: 10.1136/bmjoq-2023-002571 (PMC11097843; doi:10.1136/bmjoq-2023-002571), 2024-05-15
Supplement: bmjoq-2023-002571supp002.pdf [file bmjoq-2023-002571supp002.pdf]

**Supplementary table 2** Correlation analysis of individual assessment items of the Clinical Teamwork score versus overall teamwork

| <b>Assessment item</b>             | <b>Overall teamwork performance, r [P-value]</b> |
|------------------------------------|--------------------------------------------------|
| Overall communication              | 0.9 [ <b>&lt;0.001</b> ]                         |
| Orientating new members using SBAR | 0.49 [0.18]                                      |
| Transparent thinking               | 0.71 [ <b>0.005</b> ]                            |
| Directed communication             | 0.53 [ <b>0.05</b> ]                             |
| Closed loop communication          | 0.7 [ <b>0.005</b> ]                             |
| Overall situational awareness      | 0.73 [ <b>0.003</b> ]                            |
| Resource allocation                | 0.44 [0.112]                                     |
| Target fixation                    | 0.63 [ <b>0.02</b> ]                             |
| Overall decision making            | 0.77 [ <b>0.001</b> ]                            |
| Prioritisation                     | 0.6 [ <b>0.02</b> ]                              |
| Role clarity                       | 0.7 [ <b>0.006</b> ]                             |
| Performing as a leader/follower    | 0.7 [ <b>0.005</b> ]                             |
| Patient friendly teamwork          | 0.2 [0.57]                                       |

SBAR, situation/background/assessment/recommendation; r, regression co-efficient.
