# Supplementary material for: Ward-based in situ simulation: lessons learnt from a UK District General Hospital
Source: PubMed Central journal article supplement — BMJ Open Qual. 2024 May 15;13(2):e002571. doi: 10.1136/bmjoq-2023-002571 (PMC11097843; doi:10.1136/bmjoq-2023-002571), 2024-05-15
Supplement: bmjoq-2023-002571supp003.pdf [file bmjoq-2023-002571supp003.pdf]

**Supplementary table 3** Correlation analysis of cohort characteristics versus teamwork performance and overall communication

| Cohort characteristics                                                  | Correlation with overall teamwork performance<br>r [P-value] | Correlation with overall communication<br>r [P-value] |
|-------------------------------------------------------------------------|--------------------------------------------------------------|-------------------------------------------------------|
| <b>Anthropometric</b>                                                   |                                                              |                                                       |
| Female [n]                                                              | -0.24 [0.4]                                                  | -0.31 [0.28]                                          |
| Male [n]                                                                | 0.35 [0.22]*                                                 | 0.28 [0.31]*                                          |
| Prefer not to say gender [n]                                            | Too few n's to calculate                                     | Too few n's to calculate                              |
| Age 18-25 years [n]                                                     | 0.34 [0.23]*                                                 | 0.26 [0.38]*                                          |
| Age 26-35 years [n]                                                     | -0.49 [0.08]*                                                | -0.27 [0.35]*                                         |
| Age 36-45 years [n]                                                     | -0.42 [0.13]*                                                | -0.4 [0.16]*                                          |
| Age 46-65 years [n]                                                     | 0.18 [0.54]*                                                 | 0.07 [0.82]*                                          |
| <b>Professional background</b>                                          |                                                              |                                                       |
| Nursing and medical students [n]                                        | 0.05 [0.87]*                                                 | 0.16 [0.6]*                                           |
| Nurses and healthcare assistants (bands 2 to 7) [n]                     | -0.12 [0.69]                                                 | -0.16 [0.59]                                          |
| Advanced clinical practitioners and physician associates [n]            | 0.11 [0.72]*                                                 | 0.02 [0.94]*                                          |
| Foundation Year doctors (FY1 and FY2) [n]                               | 0.45 [0.11]*                                                 | 0.26 [0.38]*                                          |
| Junior and senior clinical fellow (JCF and SCF) [n]                     | -0.03 [0.92]*                                                | 0.02 [0.94]*                                          |
| Internal medicine trainees [n]                                          | -0.11 [0.69]*                                                | -0.1 [0.7]*                                           |
| Specialist registrars [n]                                               | -0.07 [0.87]*                                                | -0.07 [0.86]*                                         |
| Number of healthcare professionals per <i>in situ</i> simulation [mean] | -0.01 [0.88]                                                 | -0.1 [0.73]                                           |
| <b>Highest level of resuscitation training</b>                          |                                                              |                                                       |
| Number of professionals with ILS training [n]                           | 0.33 [0.25]                                                  | 0.31 [0.29]                                           |
| Number of professionals with BLS training [n]                           | -0.47 [0.09]*                                                | -0.48 [0.08]*                                         |
| Number of professionals with ALS training [n]                           | 0.19 [0.52]*                                                 | 0.13 [0.65]*                                          |
| Years of clinical experience [mean]                                     | -0.04 [0.89]                                                 | -0.07 [0.81]                                          |
| Number of previously attended <i>in situ</i> simulations [mean]         | 0.1 [0.74]                                                   | 0.06 [0.84]                                           |

\*Spearman correlation analysis; r, regression co-efficient.
